# Supplementary material
Source: PubMed Central journal article supplement (PMC1166589)
Supplement: pnas_0409513102_1.pdf [file pnas_0409513102_1.pdf]

# Fibronectin

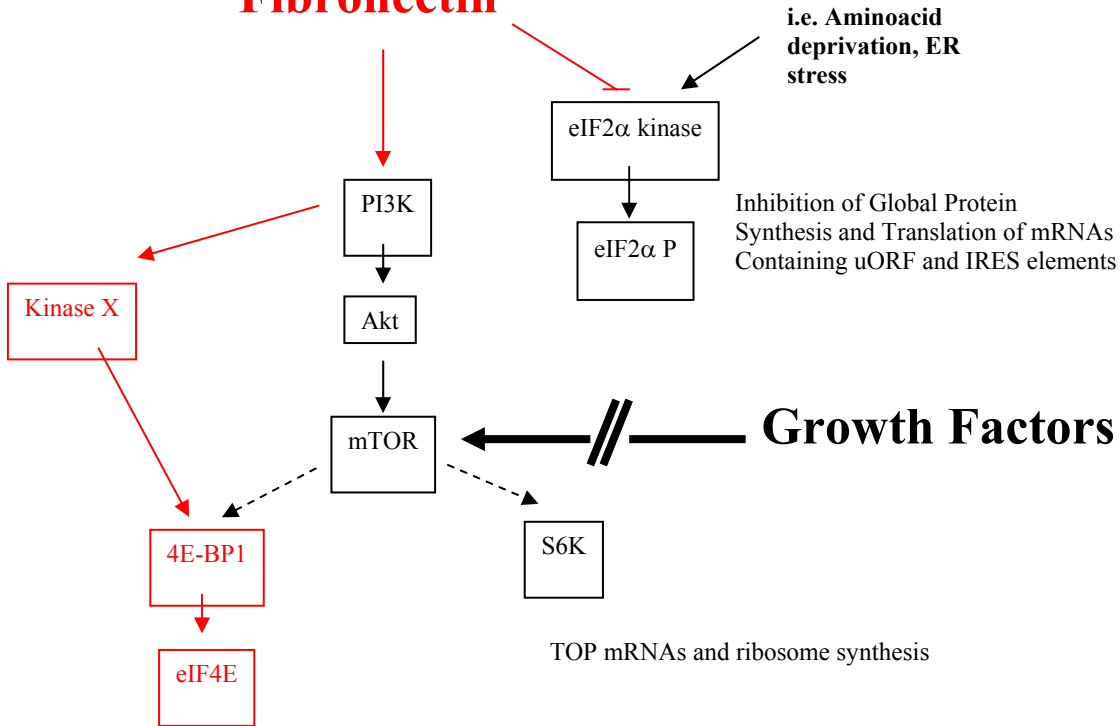

i.e. Aminoacid deprivation, ER stress

Inhibition of Global Protein Synthesis and Translation of mRNAs Containing uORF and IRES elements

**Growth Factors**

TOP mRNAs and ribosome synthesis

Enhanced Translation of mRNAs with a Highly Structured 5'-UTR
